# Supplementary material
Source: PubMed Central journal article supplement (PMC3092332)
Supplement: legends.pdf [file legends.pdf]

**Supplementary Figure 1** Expression of the *Retn* transgene under control of aP2 promoter, abundance of cDNA obtained by reverse transcription from 2 adipose tissue depos, liver, heart, soleus muscle, and macrophages isolated from 6 week old male SHR controls and *Retn* transgenic SHR. Abbreviations: Ip, intraperitoneal; Subc, subcutaneous; Soleus m., soleus muscle.

**Supplementary Figure 2** Validation of gene expression profiles obtained by digital transcriptional profiling by qRT-PCR for five transcripts identified by Ingenuity Pathway Analysis of differentially expressed genes. SHR expression values have been normalized to a relative value of 1. \* denotes  $P < 0.01$ .

**Supplementary Figure 3** Validation of gene expression profiles obtained by digital transcriptional profiling by qRT-PCR for four transcripts identified by DAVID analysis of differentially expressed genes. SHR expression values have been normalized to a relative value of 1. \* denotes  $P < 0.01$ .
