# Supplementary material
Source: PubMed Central journal article supplement (PMC3092332)
Supplement: tables.pdf [file tables.pdf]

**Supplementary table 1** Primers used for RT PCR analyses

| <b>Gene</b>                 | <b>Upstream primer</b> | <b>Downstream primer</b> |
|-----------------------------|------------------------|--------------------------|
| <i>Ppia</i> (cyclophilin)   | agcatacaggtcctggcat    | tcacctcccaagaccac        |
| Mouse <i>Retn</i> transgene | agaaggcacagcagtcttg    | tgtccagtctatccttgca      |
| Rat endogenous <i>Retn</i>  | agacttcagctccctactg    | ctagtgacgggtgtgcctt      |
| <i>Myh2</i>                 | gaaacacatgctgagctgga   | tctgcaatctgtccgtgag      |
| <i>Trdn</i>                 | gctgcaaaagccaaagaac    | gacaaagcaggtctggaagc     |
| <i>Pik3r1</i>               | ccctcagtggaactggatgt   | cggagcttggtacttcttg      |
| <i>Sod2</i>                 | cactgtggctgagctgtgtg   | tccaagcaattcaagcctct     |
| <i>Calr1</i>                | gaatggaagccacgtcaaat   | gcataggcctcatcattgg      |
| <i>Gstm1</i>                | ccacattttgagccaagt     | tgagtgccagtgtagcaagg     |
| <i>Cox5b</i>                | acccaatctagtcccatcc    | cagtggaccatttgtaggg      |
| <i>Atp5i</i>                | ttcaggtctctcegetcate   | ttctcegetgtattcttc       |
| <i>Mdh1</i>                 | ctcggaccacatcagagaca   | cgacagggaaacgagtagagc    |
| <i>Pc</i>                   | aggttcacgtgaccaaggac   | ggctgccagtctggagtaag     |
| <i>Akt1</i>                 | actcattccagaccacgac    | ccggtacaccagttctct       |
| <i>Akt2</i>                 | gagcatcggttcttctcag    | agaactgggggaagtgtgtg     |
| <i>Irs1</i>                 | tgtgccaagcaacaagaaag   | acggttcagagcagaggaa      |
| <i>Irs2</i>                 | cccagaagatagcgggtaca   | tgagaagaagtcaggtgggg     |
| <i>Pik3r1</i>               | gatcagcgagatcatcgaca   | tgtttcgttccaacat         |
| <i>Prkaa1</i>               | gcagttgcctaccacctcat   | cggcaaccaagaatgtgact     |

**Supplementary Table 2** Comparison of *Retn* transgene and endogenous *Retn* gene expression in epididymal fat isolated from transgenic and control SHR

|                  | Transgenic <i>Retn</i> in fat from young vs. old rats | Endogenous <i>Retn</i> in fat from young controls vs. young transgenics | Endogenous <i>Retn</i> in fat from old controls vs. old transgenics |
|------------------|-------------------------------------------------------|-------------------------------------------------------------------------|---------------------------------------------------------------------|
| Expression ratio | 0.56                                                  | 1.19                                                                    | 1.06                                                                |
| P value          | 0.80                                                  | 0.84                                                                    | 0.93                                                                |

Expression ratios were calculated from mean values (N=5 per group). See methods section for column definitions and description of the statistical analysis.

**Supplementary Table 3** Significantly differentially expressed Illumina tags in epididymal fat isolated from 6 week old SHR-*Retn* transgenic rats versus age-matched controls.
