# Supplementary material
Source: PubMed Central journal article supplement (PMC3092332)

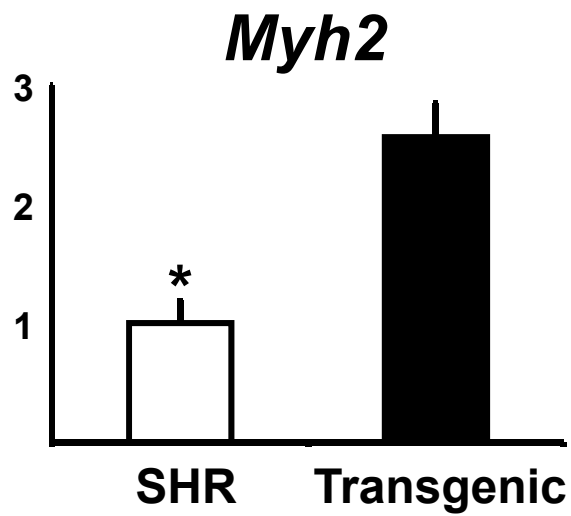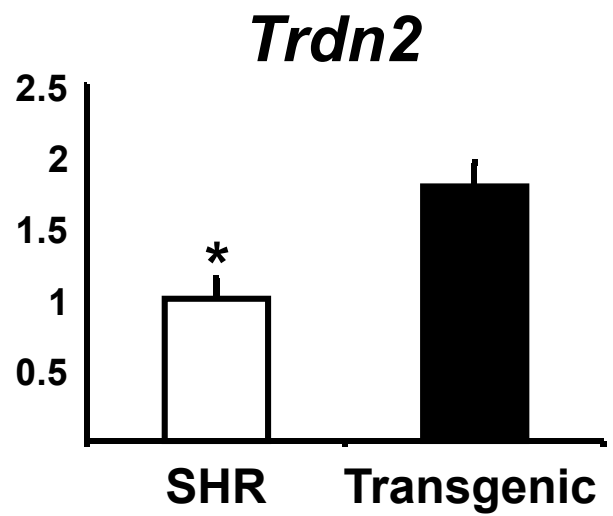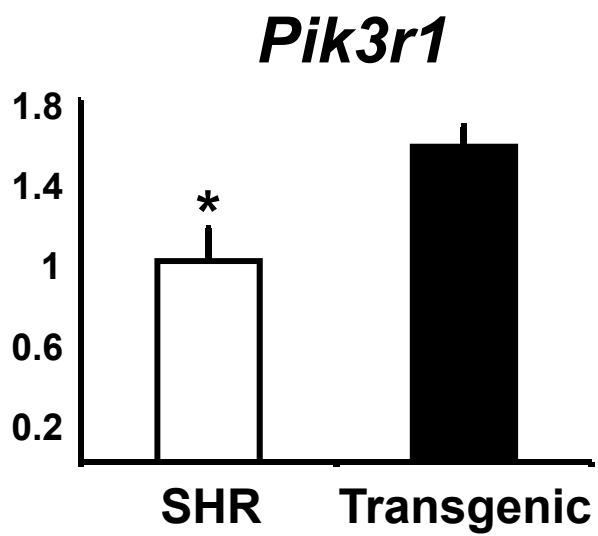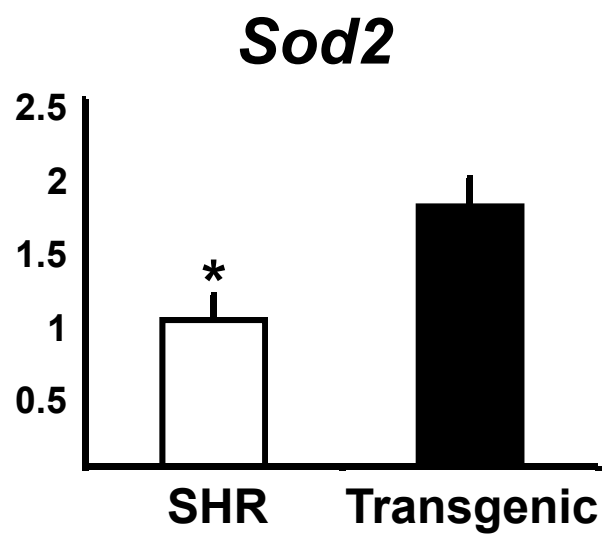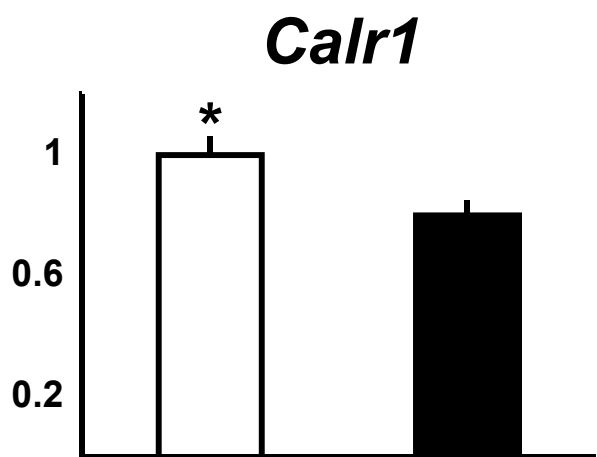

Supplement: figS2.pdf [file figS2.pdf]
